# Supplementary material
Source: Springer Nature journal article supplement (https://www.springermedizin.de/resource/supplementary/13063_2014_2322_MOESM1_ESM.pdf/9621892)
Supplement: MOESM1 [file 9621892]

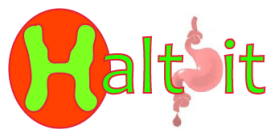

# ENTRY

PLEASE COMPLETE 1–19 BEFORE RANDOMISING THE PATIENT

## ABOUT THE HOSPITAL

|                                       |  |
|---------------------------------------|--|
| 1. Country                            |  |
| 2. Hospital code (in your Study File) |  |

## ABOUT THE PATIENT (please ensure all information below is contained in the medical records)

|                                                          |                  |                                                |                                                                                                                                            |       |            |                          |
|----------------------------------------------------------|------------------|------------------------------------------------|--------------------------------------------------------------------------------------------------------------------------------------------|-------|------------|--------------------------|
| 3. Patient's initials                                    | first            | last                                           |                                                                                                                                            |       |            |                          |
| 4. Sex (circle)                                          | <b>MALE</b>      | <b>FEMALE</b>                                  |                                                                                                                                            |       |            |                          |
| 5. Age                                                   |                  |                                                |                                                                                                                                            |       |            |                          |
| 6. Time since onset of GI bleed symptoms                 | hours            | In relation to THIS acute episode only         |                                                                                                                                            |       |            |                          |
| 7. Suspected location of GI bleed (circle one)           | <b>UPPER</b>     | <b>LOWER</b>                                   |                                                                                                                                            |       |            |                          |
| 8. Haematemesis <u>or</u> coffee-ground vomitus (circle) | <b>YES</b>       | <b>NO</b>                                      | Also circle YES if presence of blood in nasogastric aspirate                                                                               |       |            |                          |
| 9. Melaena <u>or</u> fresh blood per rectum (circle)     | <b>YES</b>       | <b>NO</b>                                      | Also circle YES if occult or gross blood present on rectal examination                                                                     |       |            |                          |
| 10. Suspected variceal bleed? (circle)                   | <b>YES</b>       | <b>NO</b>                                      |                                                                                                                                            |       |            |                          |
| 11. Systolic blood pressure                              | mmHg             | Most recent measurement prior to randomisation |                                                                                                                                            |       |            |                          |
| 12. Heart rate                                           | beats per minute | Most recent measurement prior to randomisation |                                                                                                                                            |       |            |                          |
| 13. Signs of shock present? (circle)                     | <b>YES</b>       | <b>NO</b>                                      | Shock assessment based on clinical signs (eg low BP, tachycardia, falling urine output) that requires intervention (eg intravenous fluids) |       |            |                          |
| 14. Suspected current active bleeding? (circle)          | <b>YES</b>       | <b>NO</b>                                      | Clinical judgement after considering history, signs and symptoms                                                                           |       |            |                          |
| 15. Major co-morbidities? (circle all that apply)        | CARDIOVASCULAR   | RESPIRATORY                                    | LIVER                                                                                                                                      | RENAL | MALIGNANCY | OTHER MAJOR CO-MORBIDITY |
| 16. On anti-coagulant therapy? (circle)                  | <b>YES</b>       | <b>NO</b>                                      | <b>UNKNOWN</b>                                                                                                                             |       |            |                          |
| 17. Emergency admission? (circle)                        | <b>YES</b>       | <b>NO</b>                                      | If patient already hospitalised, circle 'No'                                                                                               |       |            |                          |

## RANDOMISATION INFORMATION

(fully eligible if adult, significant upper or lower GI bleed, AND uncertainty about the use of an antifibrinolytic in that particular patient)

|                                                                          |               |                 |                             |                                                        |  |  |
|--------------------------------------------------------------------------|---------------|-----------------|-----------------------------|--------------------------------------------------------|--|--|
| 18. Eligible? (circle)                                                   | <b>YES</b>    |                 |                             | <b>NO</b><br>do not randomise, record on screening log |  |  |
| 19. Consent for entry obtained from (circle)                             | <b>WAIVER</b> | <b>RELATIVE</b> | <b>OTHER REPRESENTATIVE</b> | <b>PATIENT</b>                                         |  |  |
| 20. Treatment pack number<br>Take lowest available number treatment pack | <b>BOX</b>    |                 |                             | <b>PACK</b>                                            |  |  |
| 21. Date of randomisation                                                | day           | month           | year                        |                                                        |  |  |
| 22. Time of randomisation (24-hour clock)                                | hours         | minutes         |                             |                                                        |  |  |
| 23. a) Name of person randomising patient                                | first name    |                 |                             | last name                                              |  |  |
| b) Signature                                                             |               |                 |                             |                                                        |  |  |

PLEASE SEND THESE DATA TO THE COORDINATING CENTRE IMMEDIATELY AFTER RANDOMISATION — SEE GUIDANCE OVERLEAF

## DATA FORMS GUIDANCE

### AFTER COMPLETING THIS PAPER FORM, YOU CAN:

- ❖ Enter these data directly into the trial database. For username and password, please contact **haltit.data@Lshmt.ac.uk**
- ❖ Send as a secure scanned document by email to **haltit.data@Lshmt.ac.uk** or upload a scanned copy at **<http://ctu-files.Lshmt.ac.uk>**.
- ❖ Fax to **020 7299 4663**
- ❖ Store original form in the Investigator's Study File Section 15.
- ❖ **PLEASE GIVE A COPY OF THIS COMPLETED FORM TO THE PERSON RESPONSIBLE FOR COMPLETING THE OUTCOME FORM AT YOUR HOSPITAL**

### NOTES:

|  |
|--|
|  |
|  |
|  |
|  |

**FOR ADVERSE EVENTS, UNBLINDING AND OTHER URGENT ENQUIRIES PLEASE TELEPHONE +44(0)7768 707500**

**PLEASE NOTE: IF YOUR QUERY IS NOT URGENT PLEASE USE THE NORMAL CONTACT DETAILS IN THE INVESTIGATOR'S STUDY FILE AND WALL POSTERS**
